# Supplementary material
Source: publisher figshare collection journal article supplement (https://asha.figshare.com/articles/dataset/_/14551041)
Supplement: Supplementary file 1 [file 1]

### Supplemental Material S1.

**Bankson Language Screening test** was used to screen for any language deficit before recruiting to the study. The test assessed psycholinguistic as well as perceptual skills. The test involves 17 subtests under 5 broad subcategories. The test results of the participants for each subtest fitted the age specific normative. The total score for the test was also taken into consideration. Maximum possible total score is 153. Individual scores of all the participants for all the subcategories are given in table below.

| Sub-tests/Participants     | Max scores | EXPERIMENTAL GROUP |     |     |     |     |     |     |     |     |     | CONTROL GROUP |     |     |     |     |     |     |     |     |     |
|----------------------------|------------|--------------------|-----|-----|-----|-----|-----|-----|-----|-----|-----|---------------|-----|-----|-----|-----|-----|-----|-----|-----|-----|
|                            |            | 1                  | 2   | 3   | 4   | 5   | 6   | 7   | 8   | 9   | 10  | 1             | 2   | 3   | 4   | 5   | 6   | 7   | 8   | 9   | 10  |
| <b>Semantic Knowledge</b>  | 72         | 72                 | 71  | 69  | 70  | 70  | 72  | 72  | 71  | 72  | 72  | 72            | 71  | 71  | 70  | 70  | 70  | 70  | 71  | 72  | 72  |
| <b>Morphological Rules</b> | 27         | 27                 | 27  | 27  | 27  | 26  | 27  | 27  | 27  | 27  | 27  | 27            | 27  | 27  | 26  | 26  | 27  | 27  | 27  | 27  | 26  |
| <b>Syntactic Rules</b>     | 18         | 17                 | 18  | 18  | 16  | 16  | 18  | 16  | 17  | 18  | 17  | 18            | 15  | 18  | 16  | 18  | 18  | 16  | 15  | 16  | 16  |
| <b>Visual Perception</b>   | 18         | 17                 | 18  | 18  | 18  | 17  | 18  | 17  | 16  | 18  | 18  | 18            | 16  | 18  | 16  | 18  | 17  | 18  | 17  | 17  | 18  |
| <b>Auditory Perception</b> | 18         | 14                 | 14  | 15  | 16  | 14  | 17  | 16  | 16  | 17  | 16  | 15            | 16  | 14  | 16  | 16  | 15  | 16  | 15  | 16  | 16  |
| <b>Total Score</b>         | 153        | 147                | 148 | 147 | 147 | 143 | 152 | 148 | 147 | 152 | 150 | 150           | 145 | 148 | 144 | 148 | 147 | 147 | 145 | 148 | 148 |

**Early Reading Skills test** was used to screen the participants for any major reading deficits before recruiting to the study. It includes six subcategories as given in the table. Each participant scored within the age-specific normative in each subcategory. Individual scores of all the participants for all the sub-categories are given in table below.

| Sub-tests/Participants                 | Max scores | EXPERIMENTAL GROUP |     |     |     |     |     |     |     |     |     | CONTROL GROUP |     |     |     |     |     |     |     |     |     |
|----------------------------------------|------------|--------------------|-----|-----|-----|-----|-----|-----|-----|-----|-----|---------------|-----|-----|-----|-----|-----|-----|-----|-----|-----|
|                                        |            | 1                  | 2   | 3   | 4   | 5   | 6   | 7   | 8   | 9   | 10  | 1             | 2   | 3   | 4   | 5   | 6   | 7   | 8   | 9   | 10  |
| <b>Alphabet test</b>                   | 104        | 104                | 104 | 104 | 104 | 104 | 103 | 103 | 104 | 104 | 103 | 103           | 103 | 104 | 104 | 104 | 104 | 104 | 104 | 104 | 104 |
| <b>Visual Discrimination</b>           | 33         | 32                 | 32  | 32  | 33  | 33  | 33  | 33  | 33  | 32  | 33  | 33            | 33  | 33  | 33  | 32  | 33  | 33  | 32  | 33  | 33  |
| <b>Auditory Discrimination</b>         | 30         | 30                 | 29  | 28  | 30  | 30  | 29  | 30  | 29  | 29  | 30  | 30            | 30  | 30  | 29  | 29  | 30  | 28  | 30  | 30  | 30  |
| <b>Phoneme-Grapheme Correspondence</b> | 133        | 129                | 130 | 128 | 129 | 128 | 129 | 129 | 130 | 128 | 128 | 129           | 130 | 129 | 128 | 128 | 129 | 128 | 129 | 129 | 128 |
| <b>Structural Analysis</b>             | 47         | 27                 | 26  | 25  | 22  | 19  | 20  | 21  | 27  | 28  | 23  | 23            | 19  | 22  | 27  | 23  | 23  | 19  | 17  | 22  | 20  |
| <b>Oral Reading</b>                    | 16         | 13                 | 12  | 13  | 13  | 14  | 12  | 12  | 13  | 13  | 12  | 12            | 12  | 12  | 13  | 13  | 13  | 13  | 13  | 12  | 13  |

**Modified Mini-Mental State Examination** was done to screen participants for any major cognitive impairment. All the participants scored scores within the age-specific normative.

| Tests/Participants   | Max scores | EXPERIMENTAL GROUP |    |    |    |    |    |    |    |    |    | CONTROL GROUP |    |    |    |    |    |    |    |    |    |
|----------------------|------------|--------------------|----|----|----|----|----|----|----|----|----|---------------|----|----|----|----|----|----|----|----|----|
|                      |            | 1                  | 2  | 3  | 4  | 5  | 6  | 7  | 8  | 9  | 10 | 1             | 2  | 3  | 4  | 5  | 6  | 7  | 8  | 9  | 10 |
| <b>Modified MMSE</b> | 100        | 86                 | 88 | 90 | 91 | 91 | 87 | 93 | 94 | 94 | 93 | 93            | 93 | 94 | 88 | 94 | 91 | 91 | 91 | 90 | 89 |
