# Supplementary material
Source: publisher figshare collection journal article supplement (https://asha.figshare.com/articles/dataset/_/14551041)
Supplement: Supplementary file 2 [file 1]

**Supplemental Material S5.** Summary of the feedback obtained from teachers, participants and parents after 1 month of cessation of the training on the listening skills in noise of the study participants. The number of participants on whom each feedback was obtained is also given.

| Sl No.                     | Post training feedback                                                      | Number of participants |
|----------------------------|-----------------------------------------------------------------------------|------------------------|
| <b>Teachers' feedback</b>  |                                                                             |                        |
| 1.                         | Improved responsiveness in class                                            | 7                      |
| 2.                         | Can tolerate background noise better, not easily distracted by noise        | 6                      |
| 3.                         | Follow instructions more accurately in class                                | 5                      |
| <b>Children's feedback</b> |                                                                             |                        |
| 1.                         | Reduced strain to concentrate on teacher's instructions                     | 9                      |
| 2.                         | Can tolerate noise better                                                   | 10                     |
| 3.                         | Does not get distracted much by classmates' noise/talking in the background | 7                      |
| <b>Parents' feedback</b>   |                                                                             |                        |
| 1.                         | Easiness in children related to school work                                 | 3                      |
| 2.                         | Improved motivation                                                         | 2                      |
