# Supplementary material
Source: publisher figshare collection journal article supplement (https://asha.figshare.com/articles/dataset/_/14551041)
Supplement: Supplementary file 3 [file 1]

**Supplemental Material S4.** APD diagnostic test profile of the participants in the clinical groups (experimental and control group).

| Participants              | GDT        |            | DPT        |            | SPIN-IE    |            | DCV           |              |     | RAMST           |                     |
|---------------------------|------------|------------|------------|------------|------------|------------|---------------|--------------|-----|-----------------|---------------------|
| Sl No.                    | Right ear  | Left ear   | Right ear  | Left ear   | Right ear  | Left ear   | SCS Right ear | SCS Left ear | DCS | Auditory memory | Auditory sequencing |
| <b>Experimental group</b> |            |            |            |            |            |            |               |              |     |                 |                     |
| P1                        | 1SD        | <b>2SD</b> | 1SD        | <b>2SD</b> | <b>2SD</b> | <b>2SD</b> | <b>2SD</b>    | #            | 1SD | <b>2SD</b>      | 1SD                 |
| P2                        | #          | #          | <b>3SD</b> | <b>3SD</b> | <b>3SD</b> | <b>2SD</b> | 1SD           | #            | #   | 1SD             | #                   |
| P3                        | 1SD        | #          | #          | #          | <b>3SD</b> | <b>3SD</b> | 1SD           | 1SD          | #   | #               | #                   |
| P4                        | <b>2SD</b> | #          | <b>3SD</b> | <b>3SD</b> | <b>2SD</b> | <b>2SD</b> | #             | #            | 1SD | #               | 1SD                 |
| P5                        | <b>2SD</b> | <b>2SD</b> | #          | #          | <b>2SD</b> | <b>2SD</b> | #             | #            | #   | #               | #                   |
| P6                        | #          | #          | <b>3SD</b> | <b>3SD</b> | <b>3SD</b> | <b>2SD</b> | <b>2SD</b>    | #            | 1SD | #               | 1SD                 |
| P7                        | <b>3SD</b> | #          | <b>3SD</b> | <b>3SD</b> | <b>2SD</b> | <b>2SD</b> | <b>2SD</b>    | 1SD          | 1SD | 1SD             | 1SD                 |
| P8                        | #          | #          | <b>3SD</b> | <b>3SD</b> | <b>2SD</b> | <b>2SD</b> | 1SD           | #            | #   | 1SD             | 1SD                 |
| P9                        | #          | #          | <b>3SD</b> | <b>3SD</b> | <b>2SD</b> | <b>2SD</b> | 1SD           | <b>2SD</b>   | 1SD | #               | #                   |
| P10                       | 1SD        | <b>2SD</b> | #          | #          | <b>3SD</b> | <b>3SD</b> | 1SD           | 1SD          | 1SD | #               | 1SD                 |

| Control group |     |     |     |     |     |     |     |     |     |     |     |
|---------------|-----|-----|-----|-----|-----|-----|-----|-----|-----|-----|-----|
| P1            | 2SD | #   | #   | #   | 3SD | 3SD | #   | #   | #   | #   | 1SD |
| P2            | #   | #   | 3SD | 3SD | 2SD | 3SD | #   | 1SD | 1SD | #   | 1SD |
| P3            | #   | #   | 2SD | 3SD | 2SD | 2SD | #   | #   | 1SD | #   | #   |
| P4            | #   | #   | 3SD | 3SD | 2SD | 3SD | #   | #   | #   | #   | #   |
| P5            | 3SD | 1SD | #   | #   | 3SD | 3SD | 2SD | 2SD | 2SD | #   | 1SD |
| P6            | #   | 3SD | 3SD | 3SD | 2SD | 2SD | 1SD | 1SD | #   | #   | #   |
| P7            | #   | #   | 2SD | 3SD | 2SD | 2SD | #   | #   | #   | #   | #   |
| P8            | #   | 3SD | 3SD | 3SD | 3SD | 2SD | 2SD | 1SD | 1SD | 1SD | 1SD |
| P9            | #   | 3SD | #   | #   | 3SD | 3SD | 1SD | 1SD | 1SD | 1SD | 1SD |
| P10           | 1SD | 1SD | 2SD | 3SD | 2SD | 2SD | 1SD | 1SD | 1SD | #   | #   |

**Note:** # : scores within 1 SD from the mean; 1SD: scores >1SD from the mean; 2SD: scores >2SD from the mean; 3SD: scores >3SD from the mean.
