# Supplementary material
Source: publisher figshare collection journal article supplement (https://asha.figshare.com/articles/dataset/_/14551041)
Supplement: Supplementary file 4 [file 1]

**Supplemental Material S3.** List of complaints reported by teachers, participants, and parents in terms of the listening skills of the participants in the presence of background noise.

| Sl No                                      | Complaints                                                                                       |
|--------------------------------------------|--------------------------------------------------------------------------------------------------|
|                                            | <b>Teachers' feedback</b>                                                                        |
| 1.                                         | Misinterpretation/Inappropriate responses for instructions in class                              |
| 2.                                         | Easily distracted by background noise                                                            |
| 3.                                         | Do not follow-up/carry out instructions/class work given in classroom                            |
| 4.                                         | Responds better when spoken to in a quiet room compared to the noisy classroom                   |
| 5.                                         | Do not respond to instructions in the playground                                                 |
| <b>Children's (Participants') feedback</b> |                                                                                                  |
| 1.                                         | Difficulty to follow the teacher when somebody else is speaking/unwanted noise in the background |
| 2.                                         | Difficulty understanding teachers if spoken from the back side in the class                      |
| 3.                                         | Difficulty understanding teachers/friends when they speak fast in the class                      |
| 4.                                         | Difficulty following teammates when spoken during games in the playground                        |
| 5.                                         | Difficulty understanding people talking in a noisy place                                         |
| 6.                                         | Difficulty tolerating sound at noisy places                                                      |
| <b>Parents' feedback</b>                   |                                                                                                  |
| 1.                                         | Misses necessary instructions conveyed in class/school                                           |
| 2.                                         | Does not like going outside in noisy areas (like loud music or parties)                          |
| 3.                                         | Responds inappropriately when talked to in a noisy environment                                   |
