# Supplementary material
Source: publisher figshare collection journal article supplement (https://asha.figshare.com/articles/dataset/_/14551041)
Supplement: Supplementary file 5 [file 1]

**Supplemental Material S2.** Sample words from the word pool (monosyllables and trisyllables) utilized in the training material with their options/distractors.

| <b>Monosyllables</b> |                   |                   |                   |                   |                   |
|----------------------|-------------------|-------------------|-------------------|-------------------|-------------------|
| <b>Target word</b>   | <b>Option - 1</b> | <b>Option - 2</b> | <b>Option - 3</b> | <b>Option - 4</b> | <b>Option - 5</b> |
| <b>bark</b>          | bath              | park              | shark             | bar               | ball              |
| <b>bat</b>           | bag               | badge             | cat               | bath              | back              |
| <b>bath</b>          | park              | bark              | bag               | balm              | bar               |
| <b>bowl</b>          | cow               | board             | owl               | brown             | ball              |
| <b>drive</b>         | knife             | drink             | five              | dry               | bride             |
| <b>girl</b>          | bird              | third             | gear              | curd              | pearl             |
| <b>grey</b>          | green             | pray              | spray             | grape             | grain             |
| <b>ice</b>           | slice             | mice              | eye               | rice              | spice             |
| <b>kite</b>          | fight             | write             | white             | kind              | tight             |
| <b>knock</b>         | cock              | lock              | talk              | knob              | knot              |
| <b>lid</b>           | kid               | lip               | leg               | lift              | lick              |
| <b>red</b>           | bed               | rest              | ride              | bread             | thread            |
| <b>sweep</b>         | sleep             | seat              | steep             | sweet             | sheep             |
| <b>tree</b>          | tea               | green             | train             | three             | dream             |
| <b>wire</b>          | fire              | white             | wife              | five              | tyre              |
| <b>Trisyllables</b>  |                   |                   |                   |                   |                   |
| <b>Target word</b>   | <b>Option - 1</b> | <b>Option - 2</b> | <b>Option - 3</b> | <b>Option - 4</b> | <b>Option - 5</b> |
| <b>accident</b>      | president         | assistant         | oxygen            | ambulance         | alphabet          |
| <b>advocate</b>      | adventure         | educate           | calculate         | circulate         | chocolate         |
| <b>alphabet</b>      | accident          | celebrate         | advocate          | apartment         | assignment        |
| <b>bakery</b>        | battery           | mercury           | banana            | balcony           | gallery           |
| <b>balcony</b>       | battery           | gallery           | boundary          | bakery            | buffalo           |
| <b>battery</b>       | balcony           | boundary          | blueberry         | bakery            | basketball        |
| <b>corridor</b>      | volleyball        | crocodile         | monitor           | dinosaur          | radio             |
| <b>mosquito</b>      | tomato            | buffalo           | monitor           | potato            | multiply          |
| <b>rectangle</b>     | triangle          | octopus           | register          | reaction          | pineapple         |
| <b>screwdriver</b>   | sunflower         | scorpion          | receiver          | shoemaker         | container         |
| <b>strawberry</b>    | blueberry         | stadium           | surgery           | gooseberry        | satellite         |
| <b>telephone</b>     | microphone        | telescope         | tablespoon        | uniform           | scorpion          |
| <b>tomato</b>        | potato            | tomorrow          | mosquito          | together          | buffalo           |
| <b>triangle</b>      | rectangle         | bicycle           | together          | pineapple         | hospital          |
| <b>umbrella</b>      | underline         | papaya            | camera            | antenna           | unhappy           |
